# Supplementary material
Source: Springer Nature journal article supplement (https://www.springermedizin.de/resource/supplementary/12937_2013_680_MOESM1_ESM.pdf/25653598)

**Leucine (mg/dL)**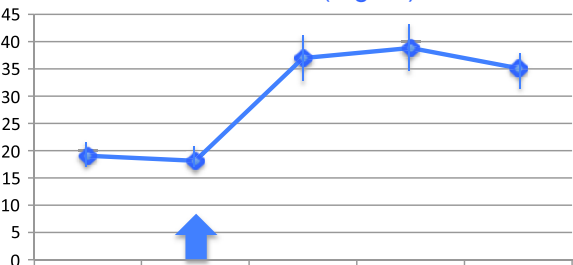**Tryptophan (mg/dL)**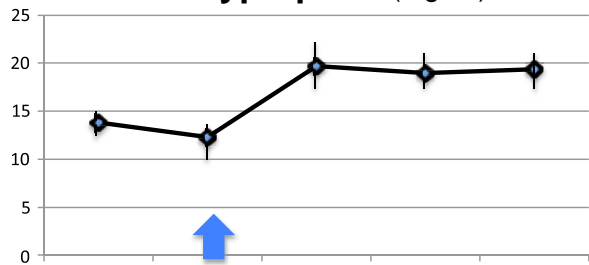**Insulin (IU/mL)**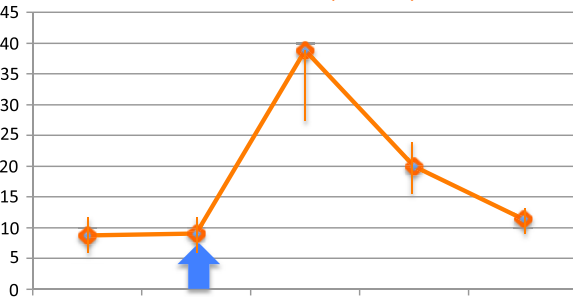**GIP (pg/mL)**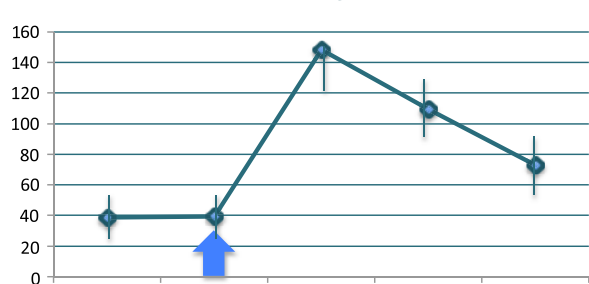

Before **WD** 30 90 120 min

Before **WD** 30 90 120 min

Supplement: MOESM1 [file 25653598]
